# Supplementary material for: Improved 2,3-Butanediol Production Rate of Metabolically Engineered Saccharomyces cerevisiae by Deletion of RIM15 and Activation of Pyruvate Consumption Pathway
Source: MDPI journal article supplement (doi:10.3390/ijms242216378), 2023-11-15
Supplement: s1 [file s1]

**Supporting information**

Improved 2,3-butanediol production rate of metabolically engineered *Saccharomyces cerevisiae* by deletion of *RIM15* and activation of pyruvate consumption pathway

Masahiko Sugimura, Taisuke Seike, Nobuyuki Okahashi, Yoshihiro Izumi, Takeshi Bamba, Jun Ishi, Fumio Matsuda\*

**Figure S1** Comparison of metabolites states among 11 industrial yeast strains of yeast by hierarchical clustering

**Table S1** Mutations in the open reading frame sequence of *RIM15* detected in the 11 industrial strains

**Table S2** Mutations in the amino acid sequence of RIM15p detected in the 11 industrial strains

**Table S3** Standard Gibbs free energy change ( $\Delta G^{0'}$ ) of metabolic reactions and pathways

**Table S4** Dry cell weight of *Saccharomyces cerevisiae* strains

**Table S5** Multiple reaction monitoring transitions for ion pair liquid chromatography tandem mass spectrometry

**Table S6** Multiple reaction monitoring transitions in liquid chromatography-pentafluorophenylpropyl-tandem mass spectrometry

**Table S7** Primers used in this study

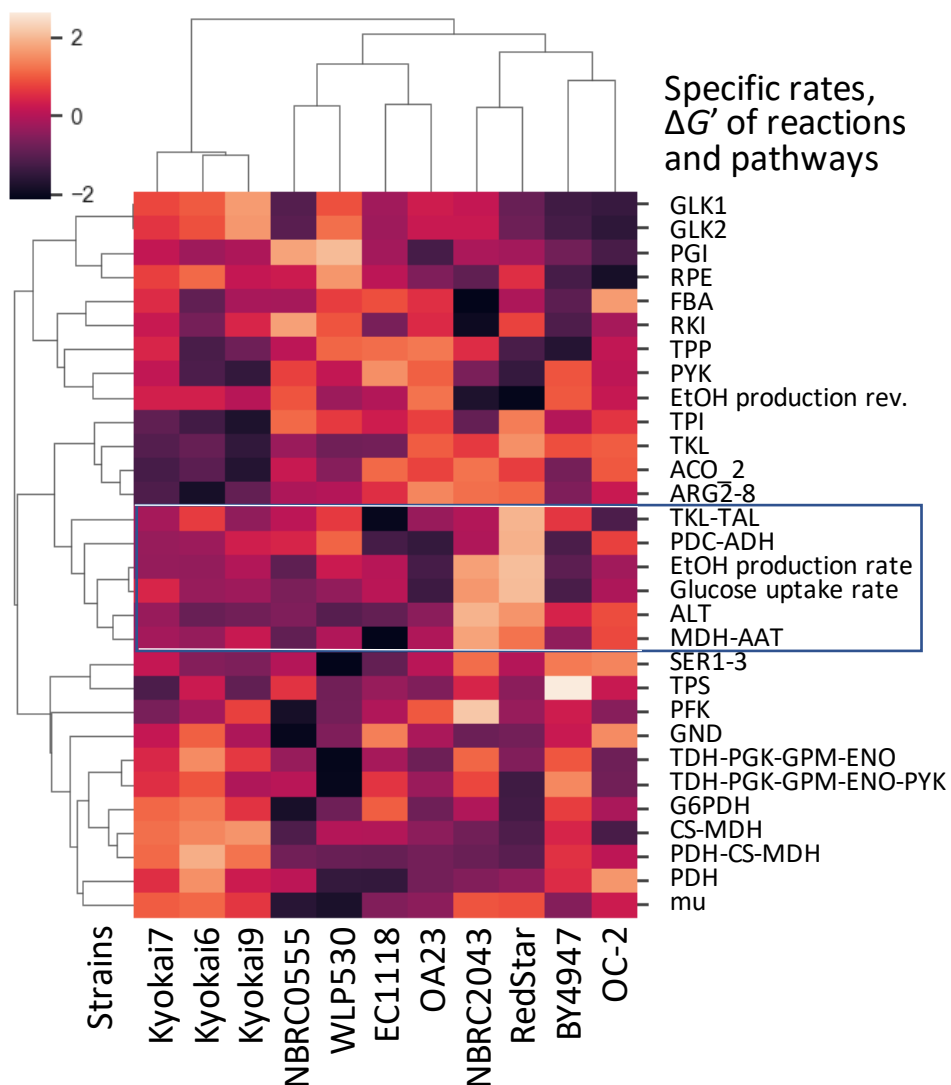

**Figure S1.** Comparison of metabolites states among 11 industrial yeast strains of yeast by hierarchical clustering. Hierarchical clustering was performed using a data matrix including 26  $\Delta G'$  values and 4 specific rates. The metabolite concentration data was not used because the correlation between the cGMP concentration and ethanol production rate could not be interpreted. The average method and correlation distance matrix were employed.

30

31 **Table S1** Mutations in the open reading frame sequence of *RIM15* detected from the 11

32 industrial strains

| Strains | Mutation                                                                                                                                                                                                                                                                                                                         |
|---------|----------------------------------------------------------------------------------------------------------------------------------------------------------------------------------------------------------------------------------------------------------------------------------------------------------------------------------|
| BY4947  |                                                                                                                                                                                                                                                                                                                                  |
| Kyokai6 | C901T, 1042insAATAATAATAAT, C1140T, A1395G, G1869T, G1875A, T1938C, A2016T, G2031A, G2364A, C2517A, C2695T, T2726C, G2832A, C2919T, C2928T, C2941T, A2955G, C2958T, G3160A, T3163G, A3471G, C4191T, G4371A, A4611G, C4722G, G4746A, C4794T, G4803A, A4830T, T4842C, A4869G, C4881T, T5016C, 5055insA, A5214C, C5220T             |
| Kyokai7 | C901T, 1042insAATAATAATAAT, C1140T, A1395G, G1869T, G1875A, T1938C, A2016T, G2031A, G2364A, C2517A, C2695T, T2726C, G2832A, C2919T, C2928T, C2941T, A2955G, C2958T, G3160A, T3163G, A3471G, C4191T, G4371A, A4611G, C4722G, G4746A, C4794T, G4803A, A4830T, T4842C, A4869G, C4881T, T5016C, 5055insA, A5214C, C5220T             |
| Kyokai9 | C901T, 1042insAATAATAATAAT, C1140T, A1395G, G1869T, G1875A, T1938C, A2016T, G2031A, G2364A, C2517A, C2695T, T2726C, G2832A, C2919T, C2928T, C2941T, A2955G, C2958T, G3160A, T3163G, A3471G, C4191T, G4371A, A4611G, C4722G, G4746A, C4794T, G4803A, A4830T, T4842C, A4869G, C4881T, T5016C, 5055insA, A5214C, C5220T             |
| QA23    | T273C, T384C, C393T, A447G, C495T, A795G, T888C, T995A, 1042insAATAATAAT, T1191C, A1395G, G1542A, G1552A, A1821C, A1825T, A2167T, G2469A, G2478A, C2496T, T2910C, C2928T, T3231C, T3345C, T3417C, A3471G, C3537T, C3601T, A3606G, C3789T, C4020T, A4080T, A4119G, C4133T, T4149A, G4371A, C4419T, A4611G, A4650G, A5214C         |
| EC1118  | T273C, T384C, C393T, A447G, C495T, A795G, T888C, T995A, 1042insAATAATAAT, T1191C, A1395G, G1542A, G1552A, A1821C, A1825T, A2167T, G2469A, G2478A, C2496T, T2910C, C2928T, T3231C, T3345C, T3417C, A3471G, C3537T, C3601T, A3606G, C3789T, C4020T, A4080T, A4119G, C4133T, T4149A, C4189G, G4371A, C4419T, A4611G, A4650G, A5214C |
| OC-2    | T273C, T384C, G392A, C393T, A447G, C495T, C667T, A795G, T888C, T995A, 1042insAATAATAAT, T1191C, A1395G, G1542A, G1552A, A1821C, A1825T, A2167T, G2469A, G2478A, C2496T, T2910C, C2928T, T3231C, T3345C, T3417C, A3471G, C3537T, C3601T, A3606G, C3789T, C4020T, A4080T, A4119G, C4133T, T4149A, G4371A, C4419T, A4611G, A4650G   |
| RedStar | T273C, T384C, C393T, A447G, C495T, G538A, A795G, T888C, 1042insAATAATAAT, T1191C, A1395G, A1821C, A1825T, A2167T, G2469A, G2478A, C2496T, T2910C, C2928T, T3231C, A3296G, T3345C, T3417C, A3471G, C3537T, C3601T, A3606G, C3789T, C4020T, A4080T, A4119G, C4133T, T4149A, G4371A, C4419T, A4611G, A4650G, A5214C                 |

---

|          |                                                                                                                                                                                                                                                                                                                                                       |
|----------|-------------------------------------------------------------------------------------------------------------------------------------------------------------------------------------------------------------------------------------------------------------------------------------------------------------------------------------------------------|
| NBRC0555 | A35G, T273C, T384C, G392A, C393T, A447G, C495T, G538A, T888C,<br>1042insAATAATAAT, T1191C, A1395G, G1810C, A1821C, A1825T, C2046A,<br>A2167T, G2469A, G2478A, C2496T, C2643A, T2910C, C2928T, T3231C,<br>T3345C, T3417C, A3471G, C3537T, C3601T, A3606G, C3789T, C4020T,<br>A4080T, A4119G, C4133T, T4149A, G4371A, C4419T, A4611G, A4650G,<br>A5214C |
|----------|-------------------------------------------------------------------------------------------------------------------------------------------------------------------------------------------------------------------------------------------------------------------------------------------------------------------------------------------------------|

---

|          |                                                                                                                                                                                                                                                                                                                                      |
|----------|--------------------------------------------------------------------------------------------------------------------------------------------------------------------------------------------------------------------------------------------------------------------------------------------------------------------------------------|
| NBRC2043 | T273C, T384C, C393T, A447G, C495T, G538A, A795G, T888C,<br>1042insAATAATAAT, T1191C, A1395G, A1821C, A1825T, A2167T, G2469A,<br>G2478A, C2496T, T2910C, C2928T, T3231C, A3296G, T3345C, T3417C,<br>A3471G, C3537T, C3601T, A3606G, C3789T, C4020T, A4080T, A4119G,<br>C4133T, T4149A, C4191T, G4371A, C4419T, A4611G, A4650G, A5214C |
|----------|--------------------------------------------------------------------------------------------------------------------------------------------------------------------------------------------------------------------------------------------------------------------------------------------------------------------------------------|

---

|        |                                                                                                                                                                                                                                                                                              |
|--------|----------------------------------------------------------------------------------------------------------------------------------------------------------------------------------------------------------------------------------------------------------------------------------------------|
| WLP530 | T384C, C393T, A447G, C495T, A795G, T888C,<br>1042insAATAATAATAATAAT, A1063T, T1191C, A1395G, C1622T,<br>A1821C, A1825T, A2167T, G2469A, G2478A, C2495T, C2496T, T2910C,<br>C2928T, T3231C, A3471G, A4611G, C4722G, G4746A, C4794T, G4803A,<br>A4830T, A4869G, C4881T, C5107G, A5214C, C5220T |
|--------|----------------------------------------------------------------------------------------------------------------------------------------------------------------------------------------------------------------------------------------------------------------------------------------------|

---

33

34

**Table S2** Mutations in the amino acid sequence of RIM15p detected from the 11 industrial strains

|         | WLP530 | NBRC2043 | NBRC0555 | RedStar | OC-2 | EC1118 | QA23 | Kyokai9 | Kyokai7 | Kyokai6 | BY4947 |
|---------|--------|----------|----------|---------|------|--------|------|---------|---------|---------|--------|
| Q12R    |        |          | +        |         |      |        |      |         |         |         |        |
| S131N   |        |          | +        |         | +    |        |      |         |         |         |        |
| D180N   |        | +        | +        | +       |      |        |      |         |         |         |        |
| R301C   |        |          |          |         |      |        |      | +       | +       | +       |        |
| L332H   |        |          |          |         | +    | +      | +    |         |         |         |        |
| N355T   | +      |          |          |         |      |        |      |         |         |         |        |
| E518K   |        |          |          |         | +    | +      | +    |         |         |         |        |
| P541L   | +      |          |          |         |      |        |      |         |         |         |        |
| G604R   |        |          | +        |         |      |        |      |         |         |         |        |
| E607D   | +      | +        | +        | +       | +    | +      | +    |         |         |         |        |
| T609S   | +      | +        | +        | +       | +    | +      | +    |         |         |         |        |
| T723S   | +      | +        | +        | +       | +    | +      | +    |         |         |         |        |
| A832V   | +      |          |          |         |      |        |      |         |         |         |        |
| H981Y   |        |          |          |         |      |        |      | +       | +       | +       |        |
| A1054T  |        |          |          |         |      |        |      | +       | +       | +       |        |
| S1055A  |        |          |          |         |      |        |      | +       | +       | +       |        |
| K1099R  |        | +        |          | +       |      |        |      |         |         |         |        |
| T1378I  |        | +        | +        | +       | +    | +      | +    |         |         |         |        |
| P1397A  |        |          |          |         |      | +      |      |         |         |         |        |
| A1686fs |        |          |          |         |      |        |      | +       | +       | +       |        |
| Q1703E  | +      |          |          |         |      |        |      |         |         |         |        |
| K1738N  | +      | +        | +        | +       |      | +      | +    |         |         |         |        |

38  
39

**Table S3** Standard Gibbs free energy change ( $\Delta G'^0$ ) of metabolic reactions and pathways

| Reaction or pathway       | Stoichiometry                                                                                                                                          | $\Delta G'^0$<br>(kJ/mol) |
|---------------------------|--------------------------------------------------------------------------------------------------------------------------------------------------------|---------------------------|
| GLK                       | Glc+ATP $\leftrightarrow$ G6P+ADP                                                                                                                      | -20.4                     |
| PGI                       | G6P $\leftrightarrow$ F6P                                                                                                                              | 2.6                       |
| PFK                       | F6P+ATP $\leftrightarrow$ FBP+ADP                                                                                                                      | -16.7                     |
| FBA                       | FBP $\leftrightarrow$ DHAP+GAP                                                                                                                         | 20.1                      |
| TPI                       | DHAP $\leftrightarrow$ GAP                                                                                                                             | 5.6                       |
| ENO                       | 2PG $\leftrightarrow$ PEP                                                                                                                              | 3.8                       |
| PYK                       | PEP+ADP $\leftrightarrow$ Pyr+ATP                                                                                                                      | -25                       |
| PDH                       | Pyr+NAD <sup>+</sup> +CoASH $\leftrightarrow$ Ac-CoA+NADH+CO <sub>2</sub>                                                                              | -42.3                     |
| G6PDH                     | G6P+NADP <sup>+</sup> $\leftrightarrow$ 6PG+NADPH                                                                                                      | -2.4                      |
| GND                       | 6PG+NADP <sup>+</sup> $\leftrightarrow$ Ru5P+NADPH+CO <sub>2</sub>                                                                                     | 2.3                       |
| RKI                       | Ru5P $\leftrightarrow$ R5P                                                                                                                             | -2.1                      |
| RPE                       | Ru5P $\leftrightarrow$ Xu5P                                                                                                                            | -3.4                      |
| TKL                       | R5P+Xu5P $\leftrightarrow$ S7P+GAP                                                                                                                     | -3.8                      |
| ACO1                      | Citric acid $\leftrightarrow$ Isocitric acid                                                                                                           | 6.8                       |
| ACO2                      | Citric acid $\leftrightarrow$ cis-Aconitic acid                                                                                                        | 8.5                       |
| ACO3                      | cis-Aconitic acid $\leftrightarrow$ Isocitric acid                                                                                                     | -1.6                      |
| IDH                       | Isocitric acid+NAD <sup>+</sup> $\leftrightarrow$ 2KG+NADH+CO <sub>2</sub>                                                                             | -2.6                      |
| ALT                       | Pyr+Glu $\leftrightarrow$ Ala+2KG                                                                                                                      | -0.2                      |
| TDH-PGK-GPM-ENO           | GAP+NAD <sup>+</sup> +ADP+Pi $\leftrightarrow$ PEP+NADH+ATP                                                                                            | -17.7                     |
| TDH-PGK-GPM-ENO-PYR       | GAP+NAD <sup>+</sup> +2 ADP+Pi $\leftrightarrow$ Pyr+NADH+2 ATP                                                                                        | -42.7                     |
| CS-MDH                    | Malate+NAD <sup>+</sup> +Ac-CoA+H <sub>2</sub> O $\leftrightarrow$ NADH+CoA-SH+Citric acid                                                             | -12.3                     |
| TKL-TAL                   | R5P+2 Xu5P $\leftrightarrow$ 2 F6P+GAP                                                                                                                 | -15.1                     |
| SER                       | 3PG+NAD <sup>+</sup> +Glu+H <sub>2</sub> O $\leftrightarrow$ Ser+NADH+2KG+Pi                                                                           | 9.6                       |
| MDH-AAT                   | Malic acid+NAD <sup>+</sup> +Glu $\leftrightarrow$ Asp+NADH+2KG                                                                                        | -10.6                     |
| ARG2,5,6,7,8              | 2 Glu+Ac-CoA+ATP+NADPH $\leftrightarrow$ Ac-Orn+CoA-SH+ADP+NADP <sup>+</sup> +Pi+2KG                                                                   | -2.3                      |
| ARG1,3,4                  | Orn+Carbamoyl-P+ATP+Asp $\leftrightarrow$ Arg+3 Pi+AMP+Fumalic acid                                                                                    | -39.5                     |
| ADE1,2,4,5,6,7,8,13,16,17 | 2 Gln+CO <sub>2</sub> +Asp+5 ATP+R5P+2 Ser+2 NADP <sup>+</sup> +2 H <sub>2</sub> O $\leftrightarrow$ IMP+2 Glu+6 Pi+4 ADP+AMP+Fumaric acid+Gly+2 NADPH | -153.2                    |
| URA-1,2,3,4,5,6,10        | Glu+R5P+4 ATP+Asp+NAD <sup>+</sup> +3 H <sub>2</sub> O $\leftrightarrow$ UDP+4 Pi+3 ADP+AMP+Glu+NADH                                                   | -108.6                    |
| TKL-ARO1,2,3,4,8-PHA      | F6P+G3P+2 PEP+ATP+Glu+NADPH $\leftrightarrow$ Phe+Xu5P+ADP+4 pi+CO <sub>2</sub> +H <sub>2</sub> O+2KG+NADP <sup>+</sup>                                | -486.5                    |
| PDC-ADH                   | Pyr+NADH $\leftrightarrow$ EtOH+NAD <sup>+</sup> +CO <sub>2</sub>                                                                                      | -39.7                     |

40

41

42 **Table S4** Dry cell weight of *S. cerevisiae* strains

| Strains  | Dry cell weight (g DCW (OD <sub>600</sub> L) <sup>-1</sup> ) |
|----------|--------------------------------------------------------------|
| BY4947   | 0.295                                                        |
| Kyokai 6 | 0.317                                                        |
| Kyokai 7 | 0.281                                                        |
| Kyokai 9 | 0.344                                                        |
| QA23     | 0.316                                                        |
| EC1118   | 0.328                                                        |
| OC-2     | 0.314                                                        |
| RedStar  | 0.326                                                        |
| NBRC2043 | 0.315                                                        |
| NBRC0555 | 0.353                                                        |
| WLP530   | 0.309                                                        |

43

44

**Table S5** MRM transitions for ion pair LC-MS/MS

| Compounds                                          | Precursor<br>ion ( <i>m/z</i> ) | Product<br>ion ( <i>m/z</i> ) | Target Q1<br>Pre Bias<br>(V) | Target<br>Collision<br>Energy (V) | Target Q3<br>Pre Bias<br>(V) | Ionization<br>polarity |
|----------------------------------------------------|---------------------------------|-------------------------------|------------------------------|-----------------------------------|------------------------------|------------------------|
| 10-Camphor sulfonic acid (IS)                      | 231.3                           | 79.9                          | 36                           | 31                                | 19                           | negative               |
| Argininosuccinic acid                              | 290.9                           | 70.2                          | -14                          | -37                               | -14                          | positive               |
| [U- <sup>13</sup> C]Argininosuccinic acid          | 300.9                           | 74.2                          | -14                          | -37                               | -14                          | positive               |
| Fumaric acid                                       | 115.2                           | 71.1                          | 11                           | 10                                | 16                           | negative               |
| [U- <sup>13</sup> C]Fumaric acid                   | 119.2                           | 74.1                          | 11                           | 10                                | 16                           | negative               |
| Arginine                                           | 174.9                           | 70.2                          | -12                          | -24                               | -28                          | positive               |
| [U- <sup>13</sup> C]Arginine                       | 180.9                           | 74.2                          | -12                          | -24                               | -28                          | positive               |
| Ornithine                                          | 133.1                           | 70.1                          | -34                          | -22                               | -28                          | positive               |
| [U- <sup>13</sup> C]Ornithine                      | 138.1                           | 74.1                          | -34                          | -22                               | -28                          | positive               |
| Citrulline                                         | 175.9                           | 70.2                          | -12                          | -24                               | -15                          | positive               |
| [U- <sup>13</sup> C]Citrulline                     | 181.9                           | 74.2                          | -12                          | -24                               | -15                          | positive               |
| <i>N</i> -Acetylmethionine                         | 174.9                           | 70.2                          | -15                          | -26                               | -27                          | positive               |
| [U- <sup>13</sup> C] <i>N</i> -Acetylmethionine    | 181.9                           | 74.2                          | -15                          | -26                               | -27                          | positive               |
| <i>N</i> -Acetylglutamic acid                      | 189.9                           | 130.1                         | -15                          | -13                               | -12                          | positive               |
| [U- <sup>13</sup> C] <i>N</i> -Acetylglutamic acid | 196.9                           | 135.1                         | -15                          | -13                               | -12                          | positive               |
| Glutamic acid                                      | 147.8                           | 84.1                          | -10                          | -17                               | -20                          | positive               |
| [U- <sup>13</sup> C]Glutamic acid                  | 152.8                           | 88.1                          | -10                          | -17                               | -20                          | positive               |
| 2-Ketoglutaric acid                                | 145.1                           | 101.0                         | 13                           | 10                                | 17                           | negative               |
| [U- <sup>13</sup> C]2-Ketoglutaric acid            | 150.1                           | 105.0                         | 13                           | 10                                | 17                           | negative               |
| Succinic acid                                      | 117.4                           | 73.0                          | 11                           | 11                                | 15                           | negative               |
| [U- <sup>13</sup> C]Succinic acid                  | 121.4                           | 76.0                          | 11                           | 11                                | 15                           | negative               |
| Malic acid                                         | 133.2                           | 115.0                         | 13                           | 15                                | 22                           | negative               |
| [U- <sup>13</sup> C]Malic acid                     | 137.2                           | 119.0                         | 13                           | 15                                | 22                           | negative               |
| Citric acid                                        | 191.2                           | 111.0                         | 12                           | 11                                | 19                           | negative               |
| [U- <sup>13</sup> C]Citric acid                    | 197.2                           | 116.0                         | 12                           | 11                                | 19                           | negative               |
| <i>cis</i> -Aconitic acid                          | 173.2                           | 85.0                          | 19                           | 12                                | 20                           | negative               |
| [U- <sup>13</sup> C] <i>cis</i> -Aconitic acid     | 179.2                           | 89.0                          | 19                           | 12                                | 20                           | negative               |
| Isocitric acid                                     | 191.2                           | 111.1                         | 19                           | 13                                | 10                           | negative               |
| [U- <sup>13</sup> C]Isocitric acid                 | 197.2                           | 116.1                         | 19                           | 13                                | 10                           | negative               |
| Aspartic acid                                      | 134.0                           | 74.0                          | -12                          | -16                               | -26                          | positive               |
| [U- <sup>13</sup> C]Aspartic acid                  | 138.0                           | 77.0                          | -12                          | -16                               | -26                          | positive               |



|                                    |       |       |     |     |     |          |
|------------------------------------|-------|-------|-----|-----|-----|----------|
| Guanine                            | 152.0 | 135.0 | -13 | -22 | -20 | positive |
| [U- <sup>13</sup> C]Guanine        | 157.0 | 140.0 | -13 | -22 | -20 | positive |
| Guanosine                          | 283.9 | 152.0 | -20 | -15 | -20 | positive |
| [U- <sup>13</sup> C]Guanosine      | 293.9 | 157.0 | -20 | -15 | -20 | positive |
| GMP                                | 363.8 | 152.1 | -10 | -17 | -14 | positive |
| [U- <sup>13</sup> C]GMP            | 373.8 | 157.1 | -10 | -17 | -14 | positive |
| Deoxyguanosine                     | 267.9 | 152.1 | -10 | -11 | -15 | positive |
| [U- <sup>13</sup> C]Deoxyguanosine | 277.9 | 157.1 | -10 | -11 | -15 | positive |
| dGMP                               | 348.0 | 152.2 | -10 | -14 | -15 | positive |
| [U- <sup>13</sup> C]dGMP           | 358.0 | 157.2 | -10 | -14 | -15 | positive |
| Adenine                            | 136.2 | 119.0 | -10 | -26 | -19 | positive |
| [U- <sup>13</sup> C]Adenine        | 141.2 | 124.0 | -10 | -26 | -19 | positive |
| Adenosine                          | 268.0 | 136.0 | -13 | -19 | -23 | positive |
| [U- <sup>13</sup> C]Adenosine      | 278.0 | 141.0 | -13 | -19 | -23 | positive |
| AMP                                | 348.0 | 136.1 | -10 | -21 | -13 | positive |
| [U- <sup>13</sup> C]AMP            | 358.0 | 141.1 | -10 | -21 | -13 | positive |
| Deoxyadenosine                     | 251.9 | 136.0 | -20 | -15 | -20 | positive |
| [U- <sup>13</sup> C]Deoxyadenosine | 261.9 | 141.0 | -20 | -15 | -20 | positive |
| dAMP                               | 332.1 | 136.1 | -16 | -17 | -14 | positive |
| [U- <sup>13</sup> C]dAMP           | 342.1 | 141.1 | -16 | -17 | -14 | positive |
| Thymine                            | 127.2 | 110.1 | -18 | -21 | -17 | positive |
| [U- <sup>13</sup> C]Thymine        | 132.2 | 115.1 | -18 | -21 | -17 | positive |
| Thymidine                          | 243.1 | 127.2 | -12 | -11 | -13 | positive |
| [U- <sup>13</sup> C]Thymidine      | 253.1 | 132.2 | -12 | -11 | -13 | positive |
| TMP                                | 320.9 | 195.1 | 20  | 16  | 21  | negative |
| [U- <sup>13</sup> C]TMP            | 330.9 | 200.0 | 20  | 16  | 21  | negative |
| dTMP                               | 322.8 | 81.0  | -12 | -17 | -18 | positive |
| [U- <sup>13</sup> C]dTMP           | 332.8 | 85.0  | -12 | -17 | -18 | positive |
| Cytosine                           | 111.9 | 95.1  | -10 | -21 | -20 | positive |
| [U- <sup>13</sup> C]Cytosine       | 116.9 | 99.1  | -10 | -21 | -20 | positive |
| Cytidine                           | 243.8 | 112.1 | -12 | -12 | -11 | positive |
| [U- <sup>13</sup> C]Cytidine       | 252.8 | 116.1 | -12 | -12 | -11 | positive |
| CMP                                | 324.0 | 112.1 | -12 | -14 | -11 | positive |
| [U- <sup>13</sup> C]CMP            | 333.0 | 116.1 | -12 | -14 | -11 | positive |
| Deoxycytidine                      | 227.9 | 112.1 | -11 | -10 | -11 | positive |

|                                   |       |       |     |     |     |          |
|-----------------------------------|-------|-------|-----|-----|-----|----------|
| [U- <sup>13</sup> C]Deoxycytidine | 236.9 | 116.1 | -11 | -10 | -11 | positive |
| dCMP                              | 307.8 | 112.1 | -14 | -12 | -11 | positive |
| [U- <sup>13</sup> C]dCMP          | 316.8 | 116.1 | -14 | -12 | -11 | positive |
| Uracil                            | 111.3 | 42.1  | 14  | 15  | 15  | negative |
| [U- <sup>13</sup> C]Uracil        | 115.3 | 44.0  | 14  | 15  | 15  | negative |
| Uridine                           | 245.0 | 113.1 | -12 | -11 | -11 | positive |
| [U- <sup>13</sup> C]Uridine       | 254.0 | 117.1 | -12 | -11 | -11 | positive |
| UMP                               | 325.1 | 97.2  | -12 | -17 | -21 | positive |
| [U- <sup>13</sup> C]UMP           | 334.1 | 97.2  | -12 | -17 | -21 | positive |
| Deoxyuridine                      | 229.0 | 113.1 | -11 | -11 | -18 | positive |
| [U- <sup>13</sup> C]Deoxyuridine  | 238.0 | 117.1 | -11 | -11 | -18 | positive |
| Hypoxanthine                      | 137.0 | 110.1 | -12 | -24 | -22 | positive |
| [U- <sup>13</sup> C]Hypoxanthine  | 142.0 | 115.0 | -12 | -24 | -22 | positive |
| Inosine                           | 268.9 | 137.1 | -13 | -11 | -13 | positive |
| [U- <sup>13</sup> C]Inosine       | 278.9 | 142.1 | -13 | -11 | -13 | positive |
| IMP                               | 349.1 | 137.1 | -10 | -15 | -13 | positive |
| [U- <sup>13</sup> C]IMP           | 359.1 | 142.1 | -10 | -15 | -13 | positive |
| Xanthine                          | 151.3 | 108.0 | 14  | 17  | 21  | negative |
| [U- <sup>13</sup> C]Xanthine      | 156.3 | 112.0 | 14  | 17  | 21  | negative |
| Xanthosine                        | 285.0 | 153.1 | -14 | -11 | -15 | positive |
| [U- <sup>13</sup> C]Xanthosine    | 295.0 | 158.1 | -14 | -11 | -15 | positive |
| cAMP                              | 329.8 | 136.1 | -15 | -26 | -13 | positive |
| [U- <sup>13</sup> C]cAMP          | 339.8 | 141.1 | -15 | -26 | -13 | positive |
| cGMP                              | 345.8 | 152.1 | -16 | -20 | -15 | positive |
| [U- <sup>13</sup> C]cGMP          | 355.8 | 157.1 | -16 | -20 | -15 | positive |
| Orotic acid                       | 155.2 | 111.0 | 14  | 11  | 22  | negative |
| [U- <sup>13</sup> C]Orotic acid   | 160.2 | 115.0 | 14  | 11  | 22  | negative |
| GSH                               | 307.8 | 76.1  | -14 | -27 | -28 | positive |
| [U- <sup>13</sup> C]GSH           | 317.8 | 78.1  | -14 | -27 | -28 | positive |
| GSSG                              | 612.9 | 231.1 | -22 | -38 | -22 | positive |
| [U- <sup>13</sup> C]GSSG          | 632.9 | 239.1 | -22 | -38 | -22 | positive |
| GABA                              | 104.0 | 87.1  | -10 | -14 | -20 | positive |
| [U- <sup>13</sup> C]GABA          | 108.0 | 91.1  | -10 | -14 | -20 | positive |

46

47

| Compounds                         | Precursor ion ( <i>m/z</i> ) | Product ion ( <i>m/z</i> ) | Target Q1 Pre Bias (V) | Target Collision Energy (V) | Target Q3 Pre Bias (V) | Ionization polarity |
|-----------------------------------|------------------------------|----------------------------|------------------------|-----------------------------|------------------------|---------------------|
| 10-Camphor sulfonic acid (IS)     | 231.3                        | 79.9                       | 15                     | 31                          | 15                     | negative            |
| [U- <sup>13</sup> C]Lysine        | 151.2                        | 151.2                      | 16                     | 12                          | 29                     | negative            |
| Arginine                          | 173.1                        | 131.2                      | 21                     | 14                          | 25                     | negative            |
| [U- <sup>13</sup> C]Arginine      | 179.1                        | 136.2                      | 21                     | 14                          | 25                     | negative            |
| Histidine                         | 154.1                        | 93.1                       | 14                     | 17                          | 18                     | negative            |
| [U- <sup>13</sup> C]Histidine     | 160.1                        | 98.1                       | 14                     | 17                          | 18                     | negative            |
| Glycine                           | 74.1                         | 74.1                       | 12                     | 10                          | 14                     | negative            |
| [U- <sup>13</sup> C]Glycine       | 76.1                         | 76.1                       | 12                     | 10                          | 14                     | negative            |
| Serine                            | 104.1                        | 74.1                       | 29                     | 14                          | 29                     | negative            |
| [U- <sup>13</sup> C]Serine        | 107.1                        | 76.1                       | 29                     | 14                          | 29                     | negative            |
| Asparagine                        | 131.0                        | 113.2                      | 13                     | 12                          | 21                     | negative            |
| [U- <sup>13</sup> C]Asparagine    | 135.0                        | 117.2                      | 13                     | 12                          | 21                     | negative            |
| Alanine                           | 88.1                         | 88.1                       | 24                     | 15                          | 16                     | negative            |
| [U- <sup>13</sup> C]Alanine       | 91.1                         | 91.1                       | 24                     | 15                          | 16                     | negative            |
| Glutamine                         | 145.0                        | 127.1                      | 17                     | 14                          | 24                     | negative            |
| [U- <sup>13</sup> C]Glutamine     | 150.0                        | 132.1                      | 17                     | 14                          | 24                     | negative            |
| Threonine                         | 118.0                        | 74.1                       | 11                     | 13                          | 30                     | negative            |
| [U- <sup>13</sup> C]Threonine     | 122.0                        | 76.1                       | 11                     | 13                          | 30                     | negative            |
| Cysteine                          | 120.0                        | 33.1                       | 12                     | 12                          | 12                     | negative            |
| [U- <sup>13</sup> C]Cysteine      | 123.0                        | 33.1                       | 12                     | 12                          | 12                     | negative            |
| Methionine                        | 148.1                        | 47.1                       | 13                     | 12                          | 19                     | negative            |
| [U- <sup>13</sup> C]Methionine    | 153.1                        | 48.1                       | 13                     | 12                          | 19                     | negative            |
| Tyrosine                          | 180.0                        | 119.1                      | 22                     | 14                          | 30                     | negative            |
| [U- <sup>13</sup> C]Tyrosine      | 189.0                        | 127.1                      | 22                     | 14                          | 30                     | negative            |
| Glutamic acid                     | 146.0                        | 102.1                      | 17                     | 15                          | 18                     | negative            |
| [U- <sup>13</sup> C]Glutamic acid | 151.0                        | 106.1                      | 17                     | 15                          | 18                     | negative            |
| Aspartic acid                     | 132.1                        | 88.2                       | 13                     | 12                          | 17                     | negative            |
| [U- <sup>13</sup> C]Aspartic acid | 136.1                        | 91.2                       | 13                     | 12                          | 17                     | negative            |
| Phenylalanine                     | 164.0                        | 147.1                      | 10                     | 14                          | 28                     | negative            |

|                                   |       |       |    |    |    |          |
|-----------------------------------|-------|-------|----|----|----|----------|
| [U- <sup>13</sup> C]Phenylalanine | 173.0 | 156.1 | 10 | 14 | 28 | negative |
| G6P                               | 259.0 | 97.1  | 30 | 16 | 18 | negative |
| [U- <sup>13</sup> C]G6P           | 265.0 | 97.1  | 30 | 16 | 18 | negative |
| R5P                               | 229.0 | 97.1  | 29 | 13 | 18 | negative |
| [U- <sup>13</sup> C]R5P           | 234.0 | 97.1  | 29 | 13 | 18 | negative |
| S7P                               | 289.0 | 97.1  | 18 | 21 | 18 | negative |
| [U- <sup>13</sup> C]S7P           | 296.0 | 97.1  | 18 | 21 | 18 | negative |
| F6P                               | 259.0 | 97.1  | 12 | 15 | 18 | negative |
| [U- <sup>13</sup> C]F6P           | 265.0 | 97.1  | 12 | 15 | 18 | negative |
| G1P                               | 258.9 | 79.1  | 11 | 24 | 14 | negative |
| [U- <sup>13</sup> C]G1P           | 264.9 | 79.1  | 11 | 24 | 14 | negative |
| GAP                               | 169.0 | 97.1  | 20 | 9  | 18 | negative |
| [U- <sup>13</sup> C]GAP           | 172.0 | 97.1  | 20 | 9  | 18 | negative |
| E4P                               | 198.9 | 97.1  | 24 | 9  | 19 | negative |
| [U- <sup>13</sup> C]E4P           | 202.9 | 97.1  | 24 | 9  | 19 | negative |
| Ru5P                              | 229.0 | 97.1  | 28 | 11 | 19 | negative |
| [U- <sup>13</sup> C]Ru5P          | 234.0 | 97.1  | 28 | 11 | 19 | negative |
| Xu5P                              | 229.0 | 97.1  | 28 | 11 | 19 | negative |
| [U- <sup>13</sup> C]Xu5P          | 234.0 | 97.1  | 28 | 11 | 19 | negative |
| Pyruvic acid                      | 87.0  | 43.0  | 24 | 12 | 16 | negative |
| [U- <sup>13</sup> C]Pyruvic acid  | 90.0  | 45.0  | 24 | 12 | 16 | negative |
| CMP                               | 322.0 | 79.1  | 14 | 40 | 30 | negative |
| [U- <sup>13</sup> C]CMP           | 331.0 | 110.0 | 14 | 40 | 21 | negative |
| NAD                               | 662.0 | 540.0 | 30 | 13 | 40 | negative |
| [U- <sup>13</sup> C]NAD           | 683.0 | 555.0 | 30 | 13 | 40 | negative |
| DHAP                              | 169.0 | 97.1  | 21 | 9  | 18 | negative |
| [U- <sup>13</sup> C]DHAP          | 172.0 | 97.1  | 21 | 9  | 18 | negative |
| UMP                               | 322.9 | 79.1  | 20 | 40 | 30 | negative |
| [U- <sup>13</sup> C]UMP           | 331.9 | 111.0 | 20 | 40 | 21 | negative |
| GMP                               | 361.9 | 79.1  | 23 | 35 | 30 | negative |
| [U- <sup>13</sup> C]GMP           | 371.9 | 79.1  | 23 | 35 | 30 | negative |
| TMP                               | 320.9 | 195.1 | 20 | 16 | 21 | negative |
| [U- <sup>13</sup> C]TMP           | 330.9 | 204.1 | 20 | 16 | 21 | negative |
| AMP                               | 346.0 | 79.1  | 15 | 26 | 30 | negative |
| [U- <sup>13</sup> C]AMP           | 356.0 | 79.1  | 15 | 26 | 30 | negative |

|                             |       |       |    |    |    |          |
|-----------------------------|-------|-------|----|----|----|----------|
| cGMP                        | 343.9 | 150.1 | 21 | 24 | 29 | negative |
| [U- <sup>13</sup> C]cGMP    | 353.9 | 155.0 | 21 | 24 | 29 | negative |
| cAMP                        | 327.9 | 134.2 | 14 | 24 | 27 | negative |
| [U- <sup>13</sup> C]cAMP    | 337.9 | 139.2 | 14 | 24 | 27 | negative |
| CDP                         | 402.0 | 158.9 | 18 | 27 | 29 | negative |
| [U- <sup>13</sup> C]CDP     | 411.0 | 158.9 | 18 | 27 | 29 | negative |
| 6PG                         | 275.0 | 97.1  | 12 | 17 | 18 | negative |
| [U- <sup>13</sup> C]6PG     | 281.0 | 97.1  | 12 | 17 | 18 | negative |
| GDP                         | 441.9 | 159.1 | 28 | 27 | 30 | negative |
| [U- <sup>13</sup> C]GDP     | 451.9 | 159.1 | 28 | 27 | 30 | negative |
| UDP                         | 403.0 | 159.1 | 18 | 26 | 29 | negative |
| [U- <sup>13</sup> C]UDP     | 412.0 | 159.1 | 18 | 26 | 29 | negative |
| 3PG+2PG                     | 185.1 | 97.1  | 21 | 13 | 18 | negative |
| [U- <sup>13</sup> C]3PG+2PG | 188.1 | 97.1  | 21 | 13 | 18 | negative |
| NADP                        | 742.2 | 619.9 | 34 | 15 | 32 | negative |
| [U- <sup>13</sup> C]NADP    | 763.2 | 634.9 | 34 | 15 | 32 | negative |
| FBP                         | 339.1 | 97.1  | 15 | 19 | 18 | negative |
| [U- <sup>13</sup> C]FBP     | 345.1 | 97.1  | 15 | 19 | 18 | negative |
| NADH                        | 664.0 | 408.0 | 28 | 34 | 27 | negative |
| [U- <sup>13</sup> C]NADH    | 685.0 | 418.0 | 28 | 34 | 27 | negative |
| ADP                         | 425.9 | 159.0 | 19 | 26 | 30 | negative |
| [U- <sup>13</sup> C]ADP     | 435.9 | 159.0 | 19 | 26 | 30 | negative |
| TDP                         | 401.0 | 159.0 | 18 | 24 | 30 | negative |
| [U- <sup>13</sup> C]TDP     | 411.0 | 159.0 | 18 | 24 | 30 | negative |
| PEP                         | 167.1 | 79.1  | 10 | 11 | 30 | negative |
| [U- <sup>13</sup> C]PEP     | 170.1 | 79.1  | 10 | 11 | 30 | negative |
| CTP                         | 481.9 | 159.0 | 22 | 30 | 29 | negative |
| [U- <sup>13</sup> C]CTP     | 490.9 | 159.0 | 22 | 30 | 29 | negative |
| GTP                         | 521.9 | 159.0 | 24 | 35 | 30 | negative |
| [U- <sup>13</sup> C]GTP     | 531.9 | 159.0 | 24 | 35 | 30 | negative |
| UTP                         | 482.9 | 159.0 | 30 | 32 | 30 | negative |
| [U- <sup>13</sup> C]UTP     | 491.9 | 159.0 | 30 | 32 | 30 | negative |
| ATP                         | 505.9 | 159.1 | 22 | 30 | 29 | negative |
| [U- <sup>13</sup> C]ATP     | 515.9 | 159.1 | 22 | 30 | 29 | negative |
| TTP                         | 481.1 | 159.0 | 21 | 30 | 29 | negative |

|                                             |        |        |    |    |    |          |
|---------------------------------------------|--------|--------|----|----|----|----------|
| [U- <sup>13</sup> C]TTP                     | 491.1  | 159.0  | 21 | 30 | 29 | negative |
| NADPH                                       | 744.2  | 408.2  | 34 | 38 | 29 | negative |
| [U- <sup>13</sup> C]NADPH                   | 765.2  | 418.2  | 34 | 38 | 29 | negative |
| Succinyl coenzyme A                         | 866.0  | 408.0  | 40 | 41 | 28 | negative |
| [U- <sup>13</sup> C]<br>Succinyl coenzyme A | 891.0  | 418.0  | 40 | 41 | 28 | negative |
| Acetyl coenzyme A                           | 808.0  | 408.0  | 36 | 37 | 19 | negative |
| [U- <sup>13</sup> C]<br>Acetyl coenzyme A   | 831.0  | 418.0  | 36 | 37 | 19 | negative |
| Carbamoyl phosphate                         | 140    | 97     | 21 | 9  | 18 | negative |
| [U- <sup>13</sup> C]<br>Carbamoyl phosphate | 141    | 97     | 21 | 9  | 18 | negative |
| PRPP                                        | 388.85 | 290.95 | 18 | 14 | 18 | negative |
| [U- <sup>13</sup> C]<br>PRPP                | 393.85 | 295.95 | 18 | 14 | 18 | negative |
| CoA-SH                                      | 766.1  | 408.1  | 20 | 30 | 27 | negative |
| [U- <sup>13</sup> C] CoA-SH                 | 787    | 418    | 20 | 30 | 27 | negative |
| Trehalose                                   | 341.1  | 179.2  | 16 | 14 | 11 | negative |
| [U- <sup>13</sup> C] Trehalose              | 353.1  | 185.2  | 16 | 14 | 11 | negative |
| UDP-Glc                                     | 565.05 | 323.05 | 22 | 27 | 15 | negative |
| [U- <sup>13</sup> C] UDP-Glc                | 580.05 | 329.05 | 22 | 27 | 15 | negative |
| T6P                                         | 421.05 | 79.1   | 19 | 26 | 30 | negative |
| [U- <sup>13</sup> C] T6P                    | 433.05 | 79.1   | 19 | 26 | 30 | Negative |

50

51

53 **Table S7 Primers used in this study**

| Name           | Sequence                                                           | Purpose                                                     |
|----------------|--------------------------------------------------------------------|-------------------------------------------------------------|
| pGK423_als_r   | TTGTCTGGCATGTGTCGACGCTAGC<br>GTTTTATATTTG                          | pGK423-ALS, Inverse PCR of pGK423                           |
| pGK423_als_f   | AATTCTACTAACCCGGGTCTAGAGA<br>ATTCAGATCTG                           | pGK423-ALS, Inverse PCR of pGK423                           |
| ALS_pGK423_f   | TAGTGGATCCATGCCAGACAAAAAG<br>TATTATGGTGCC                          | pGK423-ALS, Cloning of ALS ORF                              |
| ALS_pGK423_r   | TAGACCCGGGTAGTAGAATTGGTC<br>TGGCAACATAGTTTTACC                     | pGK423-ALS, Cloning of ALS ORF                              |
| pGK414_inv_r   | ACCGTCATCACCGAAACGC                                                | pGK414-PDC and pGK424-PDC, Inverse PCR of pGK414, 424       |
| pGK414_inv_f   | TCACAGCTTGTCTGTAAGCGGATG                                           | pGK414-PDC and pGK424-PDC, Inverse PCR of pGK414, 424       |
| PDC1_pGK414_f  | CGCGTTTCGGTGATGACGGTCTAGC<br>TGTCCTCGTTGAACATAGG                   | pGK414-PDC and pGK424-PDC, Cloning of PDC1 ORF              |
| PDC1_pGK414_r  | CCGCTTACAGACAAGCTGTGAGAA<br>ACCACACTGTTTAAACAGTGTTTCCT<br>TAATC    | pGK414-PDC and pGK424-PDC, Cloning of PDC1 ORF              |
| PDC1_TDH3p     | AAACACACATAAACAACAAAATGT<br>CTGAAATTACTTTGGGTAAATATTTG<br>TTCGAAAG | pGK414-TDH3p-PDC and pGK424-TDH3p-PDC, Cloning of TDH3p ORF |
| PDC1_TDH3t     | CAAGATTTAAAGTAAATTCATTATT<br>GCTTAGCGTTGGTAGCAGC                   | pGK414-TDH3p-PDC and pGK424-TDH3p-PDC, Cloning of TDH3p ORF |
| TDH3prom_f_pGK | CGCGTTTCGGTGATGACGGTTCATT<br>ATCAATACTGCCATTTCAAAGAATAC<br>G       | pGK414-TDH3p-PDC and pGK424-TDH3p-PDC                       |
| TDH3prom_r     | TTTGTTTGTTTATGTGTGTTTATTCGA<br>AACTAAGTTC                          | pGK414-TDH3p-PDC and pGK424-TDH3p-PDC                       |
| TDH3term_f     | GTGAATTTACTTTAAATCTTGCAATTT<br>AAATAAATTTTCTTTTATAGC               | pGK414-TDH3p-PDC and pGK424-TDH3p-PDC                       |

|                    |                                                                              |                                             |
|--------------------|------------------------------------------------------------------------------|---------------------------------------------|
| TDH3term_r_pG<br>K | CGCTTACAGACAAGCTGTGATTAAT<br>TAAATCCTGGCGGAAAAAATTCATT<br>TG                 | pGK414-TDH3p-PDC and<br>pGK424-TDH3p-PDC    |
| noxE_prom          | ATGAAGATCGTTGTCATCGGTACTAA<br>TCATG                                          | pGK424-noxE                                 |
| noxE_term          | CTACTTGGCATTCAAAGCAGCAACA<br>G                                               | pGK424-noxE                                 |
| noxE_prom_TD<br>H3 | AACACACATAAAACAAACAAAATGA<br>AGATCGTTGTCATCGGTACTAATCAT<br>G                 | pGK424-noxE                                 |
| noxE_term_TDH<br>3 | AAGATTTAAAGTAAATTCACctaCTTG<br>GCATTCAAAGCAGCAACAG                           | pGK424-noxE                                 |
| oTS1407            | GGAGGAATGTCTGATGAGTCCGTGA<br>GGACGAAACGAGTAAGCTCGTCAC<br>ATTCAAAACGTCACGTCG  | pGAL1-RIM15Δ insert fragment<br>forward     |
| oTS1408            | AAACCGACGTGACGTTTTGAATGTG<br>ACGAGCTTACTCGTTTCGTCCTCAC<br>GGA CTCATCAGACATTC | pGAL1-RIM15Δ insert fragment<br>reverse     |
| oTS1409            | TTTCTCTTGCCTCATTTGATAGAATA<br>GATAAGCCCAGTAGAGGAAGACAG<br>TAAATTTTAA         | pGAL1-RIM15Δ donor sequence<br>forward      |
| oTS1410            | CAAAGTTTTTATTTCAGTTATTTTTTTT<br>AATTATCTTTATCTTAAAATTTACTGT<br>CTTCCT        | pGAL+A32:C76IM15Δ donor<br>sequence reverse |
